# Supplementary material
Source: MDPI journal article supplement (https://www.mdpi.com/1996-1073/13/21/5730)
Supplement: s1 [file s1]

**Table S3:** Compilation showing porosity, density, intrinsic formation factor, the interface conductivity and iso-electrical point for the seven core samples.

| Sample no | Estimated in-situ fluid conductivity at 25°C ( $\mu\text{S}/\text{cm}$ ) | Porosity (%) | Density ( $\text{g}/\text{cm}^3$ ) | Formation factor | Interface conduction ( $\mu\text{S}/\text{cm}$ ) | Iso-electrical point | Source |
|-----------|--------------------------------------------------------------------------|--------------|------------------------------------|------------------|--------------------------------------------------|----------------------|--------|
| 3a        | 808.0                                                                    | 20.3         | 2.46                               | 39.7             | 30                                               | 993                  | [1]    |
| 4         | 751.0                                                                    | 8.06         | 2.80                               | 552              | 8                                                | 4416                 | [1]    |
| 9         | 909.0                                                                    | 9.7          | 2.71                               | 227              | 30                                               | 7945                 | [1]    |
| 47        | not saturated                                                            | 8.33         | 2.89                               | 100              | 5                                                | 0                    | [1]    |
| 58        | 780.0                                                                    | 10.5         | 2.70                               | 450              | 20                                               | 9000                 | [1]    |
| 61        | 780.0                                                                    | 19.2         | 2.29                               | 85               | 300                                              | 25550                | [1]    |
| 71        | not saturated                                                            | 11.7         | 2.82                               | 72.6             | 5                                                | 0                    | [1]    |

## References

1. Flóvenz, Ó.G.; Spangenberg, E.; Kulenkampff, J.; Árnason, K.; Karlsdóttir, R.; Huenges, E. The role of electrical interface conduction in geothermal exploration. Proceedings World Geothermal Congress, Antalya, Turkey, 24-29 April 2005.
