# Supplementary material
Source: MDPI journal article supplement (https://www.mdpi.com/1996-1073/13/21/5730)
Supplement: s1 [file s1]

**Table S1:** Qualitative XRD analysis of clay samples from wells HE-42 and HE-46, Hellisheidi geothermal system.

| Well  | Source | Depth (m) | d(001) untreated sample (Å) | d(001) glycolated sample (Å) | d(001) heated sample (Å) | d(002) (Å) | Clay minerals |
|-------|--------|-----------|-----------------------------|------------------------------|--------------------------|------------|---------------|
| HE-42 | [1]    | 100       | -                           | -                            | -                        |            | -             |
| HE-42 | [1]    | 192       | 14.832                      | 14.805                       | 9.921                    |            | Sme           |
| HE-42 | [1]    | 230       | 14.513                      | 14.479                       | 10.289                   |            | Sme           |
| HE-42 | [1]    | 300       | -                           | -                            | -                        |            | -             |
| HE-42 | [1]    | 440       | 13.038                      | 15.121/13.493                | 10.045                   |            | Sme           |
| HE-42 | [1]    | 464       | 14.917/13.376               | 14.669/13.918                | 10.065                   |            | Sme, MLC      |
| HE-42 | [1]    | 500       | 15.513                      | 16.449/15.513                | 9.979                    |            | Sme, MLC      |
| HE-42 | [1]    | 570       | 14.792/14.244               | 16.449/15.513                | 10.046                   | 7.281      | MLC           |
| HE-42 | [1]    | 622       | 31.084/14.681/13.423        | 29.914/14.614/13.517         | 12.670/10.030            | 7.285      | MLC           |
| HE-42 | [1]    | 660       | 14.731/13.545               | 14.614/13.518                | 10.031/8.206             | 7.252      | MLC           |
| HE-42 | [1]    | 700       | 15.107/13.122               | 13.995/13.430                | 9.916                    | 7.123      | MLC           |
| HE-42 | [1]    | 740       | 31.133/14.629               | 30.681/14.403                | 9.939                    | 7.260      | MLC           |
| HE-42 | [1]    | 778       | 14.902                      | 30.353/14.691                | 26.042/14.650            | 7.276      | Chl, MLC      |
| HE-42 | [1]    | 810       | 31.000/14.779               | 33.206/15.525/14.846         | 14.470                   | 7.180      | Chl, MLC      |
| HE-42 | [1]    | 846       | 15.039/13.735               | 14.749/13.740                | 10.082                   | 7.243      | MLC           |
| HE-42 | [1]    | 890       | 30.548/14.428               | 30.056/14.362                | 10.145                   | 7.204      | Chl, MLC      |
| HE-42 | [1]    | 970       | 14.890                      | 14.803                       | 14.804                   | 7.249      | Chl           |
| HE-42 | [1]    | 1010      | 31.027/14.775               | 31.027/14.605                | 14.800                   | 7.207      | Chl, MLC      |
| HE-42 | [1]    | 1050      | 14.589                      | 14.604                       | 14.583                   | 7.187      | Chl           |
| HE-42 | [1]    | 1090      | 14.614                      | 14.603                       | 14.431                   | 7.189      | Chl           |
| HE-42 | [1]    | 1120      | 14.603                      | 14.603                       | 14.891                   | 7.210      | Chl           |
| HE-42 | [1]    | 1152      | 14.973                      | 15.019                       | 14.385                   | 7.272      | Chl           |
| HE-42 | [1]    | 1198      | 14.783                      | 14.801                       | -                        | 7.258      | Chl           |
| HE-42 | [1]    | 1250      | 14.877                      | 14.818                       | 14.888                   | 7.265      | Chl           |
| HE-42 | [1]    | 1300      | 14.769                      | 14.769                       | 15.104                   | 7.236      | Chl           |
| HE-42 | [1]    | 1358      | 14.660                      | 14.650                       | 15.074                   | 7.194      | Chl           |
| HE-42 | [1]    | 1414      | 14.656                      | 14.628                       | 15.019                   | 7.197      | Chl           |
| HE-42 | [1]    | 1498      | 14.761                      | 14.675                       | 14.637                   | 7.205      | Chl           |
| HE-42 | [1]    | 1600      | 14.832/13.305               | 14.635/13.725                | 14.832/10.244            | 7.222      | Chl           |
| HE-42 | [1]    | 1700      | 14.671                      | 14.624                       | 14.846                   | 7.200      | Chl           |
| HE-42 | [1]    | 1800      | 14.959                      | 15.057                       | 15.279                   | 7.291      | Chl           |
| HE-42 | [1]    | 1950      | 14.793                      | 14.763                       | 15.067                   | 7.237      | Chl           |
| HE-42 | [1]    | 2100      | 14.986                      | 14.912                       | 15.213                   | 7.288      | Chl           |
| HE-42 | [1]    | 2250      | 14.721                      | 14.695                       | 15.092                   | 7.218      | Chl           |
| HE-42 | [1]    | 2530      | 14.715                      | 14.733                       | 14.715                   | 7.234      | Chl           |
| HE-42 | [1]    | 2668      | 14.442                      | 14.427                       | 14.604                   | 7.143      | Chl           |
| HE-42 | [1]    | 2810      | 14.573                      | 14.568                       | 14.569                   | 7.181      | Chl           |
| HE-42 | [1]    | 3000      | 14.499                      | 14.467                       | -                        | 7.162      | Chl           |
| HE-42 | [1]    | 3150      | 14.993/14.621               | 14.993/14.568                | 14.561                   | 7.193      | Chl           |
| HE-42 | [1]    | 3322      | missing                     | 15.098                       | 15.003                   | -          | Chl           |
| HE-46 | [2]    | 134       | 13.159                      | 17.077                       | 9.976                    |            | Sme           |
| HE-46 | [2]    | 184       | 13.086                      |                              |                          |            | -             |
| HE-46 | [2]    | 286       | 14.903, 12.870              | 16.890                       | 9.766                    |            | Sme           |
| HE-46 | [2]    | 358       | 13.039                      | 17.106                       | 9.982                    |            | Sme           |

| Well  | Source | Depth<br>(m) | d(001) untreated<br>sample (Å) | d(001) glycolated<br>sample (Å) | d(001) heated<br>sample (Å) | d(002) (Å) | Clay minerals |
|-------|--------|--------------|--------------------------------|---------------------------------|-----------------------------|------------|---------------|
| HE-46 | [2]    | 420          | 31.194/15.013/13.<br>183       | -                               | 9.982                       | 7.204      | MLC           |
| HE-46 | [2]    | 460          | 13.619                         | 13.776                          | 10.029                      | 7.234      | MLC           |
| HE-46 | [2]    | 520          | 14.626/12.764                  | 14.618/12.759                   | 10.012                      | 7.204      | MLC           |
| HE-46 | [2]    | 560          | 15.173/14.564/12.<br>709       | 14.587/12.753                   | 14.455/12.769/9.9<br>25     | 7.193      | MLC           |
| HE-46 | [2]    | 600          | 31.415/14.619/12.<br>820       | 31.336/14.619/12.<br>915        | 14.584/10.038               | 7.203      | MLC           |
| HE-46 | [2]    | 622          | 14.813/12.882                  | 14.821                          | 14.821                      | 7.235      | Chl           |
| HE-46 | [2]    | 650          | 30.975/14.483                  | 30.261/14.452                   | 14.472                      | 7.146      | MLC           |
| HE-46 | [2]    | 694          | 30.491/14.652                  | 30.554/14.675                   | 14.679                      | 7.204      | MLC           |
| HE-46 | [2]    | 750          | 14.832                         | 14.871                          | 14.825                      | 7.252      | Chl, MLC      |
| HE-46 | [2]    | 796          | 14.856                         | 14.821                          | 14.958                      | 7.237      | Chl           |
| HE-46 | [2]    | 856          | 14.755                         | 14.760                          | 15.050                      | 7.223      | Chl           |
| HE-46 | [2]    | 880          | 14.792                         | 14.774                          | 15.061                      | 7.233      | Chl           |
| HE-46 | [2]    | 946          | 14.754                         | 14.749                          | 14.888                      | 7.220      | Chl           |
| HE-46 | [2]    | 990          | 14.675                         | 14.643                          | 14.978                      | 7.206      | Chl           |
| HE-46 | [2]    | 1030         | 14.613                         | 17.545/14.613                   | 15.127                      | 7.187      | Chl           |
| HE-46 | [2]    | 1088         | 14.607                         | 14.642                          | 14.879                      | 7.189      | Chl           |
| HE-46 | [2]    | 1132         | 14.467                         | 14.493                          | 14.746                      | 7.154      | Chl           |
| HE-46 | [2]    | 1190         | 14.804                         | 14.813                          | 14.959                      | 7.227      | Chl           |
| HE-46 | [2]    | 1300         | 14.823                         | 14.840                          | 15.056                      | 7.241      | Chl           |
| HE-46 | [2]    | 1340         | 14.766                         | 14.771                          | 14.898                      | 7.226      | Chl           |
| HE-46 | [2]    | 1390         | 14.855                         | 14.854                          | 14.890                      | 7.245      | Chl           |
| HE-46 | [2]    | 1426         | 14.617                         | 14.612                          | 14.572                      | 7.214      | Chl           |
| HE-46 | [2]    | 1500         | 14.602                         | 14.606                          | 14.934                      | 7.189      | Chl           |
| HE-46 | [2]    | 1566         | 14.579                         | 14.594                          | 15.598                      | 7.179      | Chl           |
| HE-46 | [2]    | 1634         | 14.605                         | 14.616                          | 14.799                      | 7.132      | Chl           |
| HE-46 | [2]    | 1720         | 14.647                         | 14.649                          | 15.170                      | 7.196      | Chl           |
| HE-46 | [2]    | 1890         | 14.814                         | 14.794                          | 14.993                      | 7.241      | Chl           |
| HE-46 | [2]    | 2140         | 14.663                         | 14.685                          | 15.179                      | 7.205      | Chl           |
| HE-46 | [2]    | 2250         | 14.706                         | 14.734                          | 14.876                      | 7.216      | Chl           |
| HE-46 | [2]    | 2314         | 14.795                         | 14.807                          | -                           | 7.239      | Chl           |
| HE-46 | [2]    | 2400         | 14.525                         | 14.546                          | 14.868                      | 7.175      | Chl           |

## Method

After careful washing of each cutting sample in distilled water, about 2 g of sample material is put in a glass tube. The tube is filled with distilled water and put in a mechanical shaker. Subsequently the sample is shaken for about four hours. After shaking, the clay slurry is allowed to settle down for 10 minutes. The clay slurry is then transferred onto a glass-slide, using a pipette. The sample is dried under ambient temperature conditions before it is measured (untreated). After the measurement the sample is placed inside a closed desiccator filled with ethylene-glycol where it is left for 24 hours before it is measured again (glycolated). Subsequently, the sample is heated in a furnace for about 1 hour at a temperature of 550 °C. After cooling, the sample is measured again (heated).

The equipment used is a Bruker AXS D8 Focus, producing Cu  $k\alpha$  radiation with 1.54 Å wavelength at 40 kV and 40 mA. Each sample is measured from  $2\Theta=2^\circ$ – $14^\circ$ , in  $0.02^\circ$  increments (steps) and measured for 1 second at each step.

## References

1. Gunnarsdóttir, S.H. Jarðfræði og ummyndun í nágrenni Reykjavells á Hellisheiði. MSc thesis, University of Iceland, 2012.
2. Snaebjörnsdóttir, S.Ó. Jarðfræði og jarðhitaummyndun við vesturjaðar sigdældar Hengils. MSc thesis, University of Iceland, 2011.
