# Supplementary material
Source: MDPI journal article supplement (https://www.mdpi.com/1996-1073/13/21/5730)
Supplement: s1 [file s1]

**Table S6:** Results of CEC analysis from well HE-46, Hellisheidi geothermal system.

| Depth (m) | Mass (g) | Water content (%) | C <sub>Cu-trien</sub> (mol) | Absorbance (blank) | Absorbance (supernatant solution) | CEC (meq/100 g) | Alteration zone |
|-----------|----------|-------------------|-----------------------------|--------------------|-----------------------------------|-----------------|-----------------|
| 230       | 0.2009   | 5.59              | 0.0091                      | 0.230              | 0.128                             | 42.6            | Zeo-Sme         |
| 280       | 0.2000   | 4.92              | 0.0091                      | 0.230              | 0.132                             | 40.8            | Zeo-Sme         |
| 320       | 0.2002   | 4.68              | 0.0091                      | 0.230              | 0.135                             | 39.4            | Zeo-Sme         |
| 360       | 0.2008   | 3.75              | 0.0101                      | 0.256              | 0.187                             | 28.2            | Zeo-Sme         |
| 360       | 0.2002   | 2.73              | 0.0091                      | 0.230              | 0.171                             | 24.0            | Zeo-Sme         |
| 380       | 0.2002   | 1.74              | 0.0091                      | 0.230              | 0.182                             | 19.3            | Zeo-Sme         |
| 400       | 0.2008   | 3.52              | 0.0101                      | 0.256              | 0.184                             | 29.3            | Zeo-Sme         |
| 430       | 0.2003   | 2.32              | 0.0091                      | 0.230              | 0.169                             | 24.7            | MLC             |
| 440       | 0.2007   | 2.25              | 0.0091                      | 0.230              | 0.169                             | 24.6            | MLC             |
| 460       | 0.2008   | 1.98              | 0.0091                      | 0.230              | 0.186                             | 17.7            | MLC             |
| 480       | 0.2007   | 1.50              | 0.0091                      | 0.230              | 0.192                             | 15.2            | MLC             |
| 500       | 0.2004   | 1.14              | 0.0101                      | 0.256              | 0.228                             | 11.2            | MLC             |
| 540       | 0.2008   | 1.47              | 0.0101                      | 0.256              | 0.232                             | 9.6             | MLC             |
| 580       | 0.2006   | 0.57              | 0.0101                      | 0.256              | 0.239                             | 6.7             | MLC             |
| 600       | 0.2002   | 0.40              | 0.0101                      | 0.256              | 0.240                             | 6.3             | MLC             |
| 620       | 0.2009   | 0.39              | 0.0101                      | 0.266              | 0.244                             | 8.4             | MLC             |
| 650       | 0.2009   | 0.14              | 0.0101                      | 0.266              | 0.257                             | 3.4             | Chl-Ep          |
| 680       | 0.2004   | 0.22              | 0.0101                      | 0.266              | 0.252                             | 5.3             | Chl-Ep          |
| 800       | 0.2008   | 0.06              | 0.0101                      | 0.266              | 0.258                             | 3.0             | Chl-Ep          |
| 920       | 0.2008   | 0.10              | 0.0101                      | 0.266              | 0.257                             | 3.4             | Chl-Ep          |
| 980       | 0.2000   | 0.10              | 0.0101                      | 0.266              | 0.260                             | 2.3             | Chl-Ep          |
| 1100      | 0.2010   | 0.00              | 0.0101                      | 0.281              | 0.269                             | 4.3             | Ep-Amp          |
| 1190      | 0.2009   | 0.03              | 0.0101                      | 0.281              | 0.271                             | 3.6             | Ep-Amp          |
| 1260      | 0.2008   | 0.06              | 0.0101                      | 0.281              | 0.272                             | 3.2             | Ep-Amp          |
| 1460      | 0.2005   | 0.02              | 0.0101                      | 0.281              | 0.272                             | 3.2             | Ep-Amp          |
| 1480      | 0.2009   | 0.02              | 0.0101                      | 0.281              | 0.275                             | 2.1             | Ep-Amp          |
| 2000      | 0.2009   | 0.00              | 0.0101                      | 0.281              | 0.275                             | 2.1             | Ep-Amp          |

Abbreviation Alteration zones. Zeo-Sme: zeolite-smectite; MLC: mixed-layers clays; Chl-Ep: chlorite-epidote; Ep-Amp: epidote-amphibole
