# Supplementary material
Source: MDPI journal article supplement (https://www.mdpi.com/1996-1073/13/21/5730)
Supplement: s1 [file s1]

**Table S5:** Results of CEC analysis from well HE-42, Hellisheidi geothermal system.

| Depth (m) | Mass (g) | Water content (%) | C <sub>Cu-trien</sub> (mol) | Absorbance (blank) | Absorbance (supernatant solution) | CEC (meq/100 g) | Alteration zone |
|-----------|----------|-------------------|-----------------------------|--------------------|-----------------------------------|-----------------|-----------------|
| 350       | 0.2009   | 0.90              | 0.01010                     | 0.261              | 0.247                             | 5.44            | Zeo-Sme         |
| 500       | 0.2001   | 2.95              | 0.01010                     | 0.261              | 0.187                             | 29.50           | Zeo-Sme         |
| 596       | 0.2003   | 3.10              | 0.01010                     | 0.261              | 0.189                             | 28.72           | MLC             |
| 700       | 0.2008   | 2.01              | 0.01010                     | 0.261              | 0.209                             | 20.46           | MLC             |
| 750       | 0.2008   | 1.00              | 0.01010                     | 0.261              | 0.239                             | 8.57            | MLC             |
| 780       | 0.2007   | 1.16              | 0.01010                     | 0.261              | 0.236                             | 9.76            | MLC             |
| 900       | 0.2002   | 1.12              | 0.01010                     | 0.259              | 0.250                             | 3.55            | Chl             |
| 950       | 0.2007   | 0.60              | 0.00910                     | 0.234              | 0.220                             | 5.46            | Chl             |
| 1000      | 0.2000   | 0.36              | 0.00910                     | 0.234              | 0.228                             | 2.34            | Chl             |
| 1120      | 0.2007   | 0.24              | 0.00910                     | 0.234              | 0.229                             | 1.94            | Chl-Ep          |
| 1220      | 0.2007   | 0.32              | 0.01010                     | 0.259              | 0.256                             | 1.17            | Chl-Ep          |
| 1240      | 0.2000   | 0.12              | 0.00910                     | 0.234              | 0.233                             | 0.39            | Chl-Ep          |

Abbreviation Alteration zones: Zeo-Sme: zeolite-smectite; MLC: mixed-layers clays; Chl: chlorite; Chl-Ep: chlorite-epidote; Ep-Amp: epidote-amphibole.
