# Supplementary material
Source: MDPI journal article supplement (https://www.mdpi.com/1996-1073/13/21/5730)
Supplement: s1 [file s1]

**Table S7:** Results of CEC analysis for well RN-15, Reykjanes geothermal system.

| Depth (m) | Mass (g) | Water content (%) | C <sub>Cu-trien</sub> (mol) | Absorbance (blank) | Absorbance (supernatant solution) | CEC (meq/100 g) |
|-----------|----------|-------------------|-----------------------------|--------------------|-----------------------------------|-----------------|
| 270       | 0.2000   | 0.28              | 0.0092                      | 0.227              | 0.141                             | 35.0            |
| 400       | 0.2006   | 0.42              | 0.0092                      | 0.227              | 0.159                             | 27.6            |
| 450       | 0.2000   | 3.26              | 0.0092                      | 0.230              | 0.158                             | 29.8            |
| 600       | 0.2003   | 3.21              | 0.0092                      | 0.230              | 0.174                             | 23.1            |
| 700       | 0.2000   | 2.62              | 0.0092                      | 0.230              | 0.168                             | 25.5            |
| 800       | 0.2003   | 2.06              | 0.0092                      | 0.230              | 0.187                             | 17.5            |
| 850       | 0.2006   | 0.19              | 0.0092                      | 0.227              | 0.196                             | 12.6            |
| 890       | 0.2000   | 2.06              | 0.0092                      | 0.230              | 0.154                             | 31.0            |
| 940       | 0.2003   | 1.48              | 0.0092                      | 0.230              | 0.215                             | 6.1             |
| 1030      | 0.2007   | 1.18              | 0.0092                      | 0.228              | 0.222                             | 2.4             |
| 1080      | 0.2008   | 0.27              | 0.0092                      | 0.227              | 0.225                             | 0.8             |
| 1130      | 0.2001   | 2.38              | 0.0092                      | 0.227              | 0.195                             | 13.3            |
| 1170      | 0.2009   | 0.17              | 0.0092                      | 0.227              | 0.221                             | 2.4             |
| 1220      | 0.2007   | 0.15              | 0.0092                      | 0.227              | 0.219                             | 3.2             |
| 1320      | 0.2000   | 0.54              | 0.0092                      | 0.228              | 0.227                             | 0.4             |
| 1500      | 0.2008   | 0.27              | 0.0092                      | 0.228              | 0.22                              | 3.2             |
| 1650      | 0.2007   | 0.33              | 0.0092                      | 0.228              | 0.226                             | 0.8             |
| 1880      | 0.2000   | 0.86              | 0.0092                      | 0.228              | 0.225                             | 1.2             |
