# Supplementary material
Source: MDPI journal article supplement (https://www.mdpi.com/1996-1073/13/21/5730)
Supplement: s1 [file s1]

**Table S2:** Description of seven core samples.

| Sample no. | Location       | Well no. | Year of drilling | Rock type     | Alteration zone | Sample depth (m) | Source |
|------------|----------------|----------|------------------|---------------|-----------------|------------------|--------|
| 3a         | Hengill        | ÖJ-1     | 1994             | Hyaloclastite | Chlorite        | 795              | [1]    |
| 4          | Nesjavellir    | NJ-17    | 1996             | Basalt        | Chlorite        | 876/877          | [1]    |
| 9          | Krafla         | K-2      | 1974             | Basalt        | Chlorite        | 540              | [1]    |
| 47         | Heiðmörk       | surface  | 2003             | Basalt        | unaltered       | 0                | [1]    |
| 58         | Krafla         | KH-1     | 1991             | Basalt        | Smectite        | 187              | [1]    |
| 61         | Krafla         | KH-1     | 1991             | Hyaloclastite | Smectite        | 195              | [1]    |
| 71         | Reykjanesskagi | surface  | 2003             | Basalt        | unaltered       | 0                | [1]    |

## References

1. Flóvenz, Ó.G.; Spangenberg, E.; Kulenkampff, J.; Árnason, K.; Karlsdóttir, R.; Huenges, E. The role of electrical interface conduction in geothermal exploration. Proceedings World Geothermal Congress, Antalya, Turkey, 24-29 April 2005.
