# Supplementary material
Source: MDPI journal article supplement (https://www.mdpi.com/1996-1073/13/21/5730)
Supplement: s1 [file s1]

**Table S4:** Results of CEC measurements from well KJ-18 in Krafla.

| Depth (m) | Mass (g) | Water content (%) | C <sub>Cu-trien</sub> (mol) | Absorbance (blank) | Absorbance (super-natant solution) | CEC (meq/100 g) | Lithology | In-trusion | Alter-ation |
|-----------|----------|-------------------|-----------------------------|--------------------|------------------------------------|-----------------|-----------|------------|-------------|
| 74        | 0.2004   | 0.63              | 0.0101                      | 0.264              | 0.254                              | 3.8             | BB        |            | Zeo-Sme     |
| 90        | 0.5006   | 2.38              | 0.0101                      | 0.262              | 0.236                              | 4.1             | BB        |            | Zeo-Sme     |
| 100       | 0.5002   | 0.39              | 0.0101                      | 0.262              | 0.221                              | 6.3             | BB        |            | Zeo-Sme     |
| 116       | 0.2002   | 7.00              | 0.0101                      | 0.264              | 0.131                              | 54.7            | BB        |            | Zeo-Sme     |
| 130       | 0.2002   | 1.20              | 0.0101                      | 0.264              | 0.242                              | 8.5             | F-m B     |            | Zeo-Sme     |
| 160       | 0.2005   | 10.00             | 0.0091                      | 0.225              | 0.127                              | 43.9            | BT        |            | Zeo-Sme     |
| 170       | 0.2014   | 6.96              | 0.0101                      | 0.264              | 0.127                              | 56.0            | BT        |            | Zeo-Sme     |
| 200       | 0.2003   | 6.28              | 0.0101                      | 0.262              | 0.141                              | 49.7            | F-m B     |            | Zeo-Sme     |
| 210       | 0.2001   | 5.93              | 0.0091                      | 0.225              | 0.100                              | 53.7            | BB        |            | Zeo-Sme     |
| 236       | 0.1997   | 2.65              | 0.0091                      | 0.225              | 0.166                              | 24.5            | F-m B     |            | Zeo-Sme     |
| 270       | 0.1997   | 1.61              | 0.0091                      | 0.225              | 0.186                              | 16.1            | BT        |            | Zeo-Sme     |
| 286       | 0.2006   | 1.97              | 0.0091                      | 0.225              | 0.182                              | 17.7            | GB        |            | Zeo-Sme     |
| 302       | 0.2004   | 1.94              | 0.0091                      | 0.225              | 0.187                              | 15.6            | GB        |            | Zeo-Sme     |
| 320       | 0.2022   | 2.44              | 0.0091                      | 0.226              | 0.174                              | 21.2            | F-m B     | (x)        | Zeo-Sme     |
| 324       | 0.2000   | 1.44              | 0.0091                      | 0.226              | 0.197                              | 11.8            | F-m B     | (x)        | Zeo-Sme     |
| 332       | 0.2002   | 4.01              | 0.0091                      | 0.226              | 0.147                              | 33.1            | BB        |            | Zeo-Sme     |
| 340       | 0.5014   | 3.48              | 0.0101                      | 0.262              | 0.163                              | 15.8            | BB        |            | Zeo-Sme     |
| 348       | 0.2006   | 3.24              | 0.0101                      | 0.264              | 0.204                              | 23.7            | BT        |            | Zeo-Sme     |
| 384       | 0.2015   | 2.14              | 0.0091                      | 0.226              | 0.175                              | 20.8            | F-m B     | (x)        | MLC         |
| 390       | 0.2004   | 2.38              | 0.0101                      | 0.264              | 0.208                              | 21.9            | M-c B     | (x)        | MLC         |
| 400       | 0.2013   | 1.18              | 0.0091                      | 0.226              | 0.199                              | 10.9            | M-c B     | (x)        | MLC         |
| 418       | 0.2015   | 0.90              | 0.0091                      | 0.226              | 0.204                              | 8.9             | BT/GB     |            | MLC         |
| 434       | 0.2018   | 1.01              | 0.0091                      | 0.226              | 0.205                              | 8.5             | GB        |            | MLC         |
| 442       | 0.2004   | 1.27              | 0.0091                      | 0.226              | 0.194                              | 13.0            | F-m B     |            | MLC         |
| 452       | 0.2013   | 1.01              | 0.0091                      | 0.226              | 0.194                              | 12.9            | F-m B     |            | MLC         |
| 460       | 0.2013   | 0.45              | 0.0091                      | 0.226              | 0.209                              | 6.8             | BT        |            | MLC         |
| 470       | 0.2012   | 0.99              | 0.0091                      | 0.226              | 0.197                              | 11.7            | F-m B     |            | MLC         |
| 483       | 0.2014   | 0.47              | 0.0091                      | 0.226              | 0.217                              | 3.6             | F-m B     |            | MLC         |
| 500       | 0.2006   | 0.75              | 0.0101                      | 0.264              | 0.245                              | 7.3             | M-c B     | (x)        | MLC         |
| 506       | 0.2013   | 0.66              | 0.0091                      | 0.233              | 0.210                              | 9.0             | F-m B     |            | MLC         |
| 516       | 0.2010   | 1.63              | 0.0091                      | 0.233              | 0.182                              | 20.1            | F-m B     |            | MLC         |
| 520       | 0.2017   | 1.12              | 0.0091                      | 0.233              | 0.197                              | 14.1            | M-c B     | (x)        | MLC         |
| 530       | 0.2003   | 0.28              | 0.0091                      | 0.233              | 0.224                              | 3.5             | BB        |            | MLC         |
| 550       | 0.2000   | 1.55              | 0.0091                      | 0.233              | 0.188                              | 17.9            | BB        |            | Chl-Ep      |
| 560       | 0.2000   | 0.75              | 0.0091                      | 0.233              | 0.208                              | 9.8             | F-m B     |            | Chl-Ep      |
| 570       | 0.2006   | 1.32              | 0.0091                      | 0.233              | 0.189                              | 17.4            | BB        |            | Chl-Ep      |
| 582       | 0.1998   | 0.78              | 0.0091                      | 0.233              | 0.204                              | 11.4            | BB        |            | Chl-Ep      |
| 600       | 0.2003   | 0.34              | 0.0091                      | 0.233              | 0.220                              | 5.1             | BB        |            | Chl-Ep      |

| Depth (m) | Mass (g) | Water content (%) | C <sub>Cu-trien</sub> (mol) | Ab-sorbance (blank) | Absorbance (super-natant solution) | CEC (meq/100 g) | Lithology | In-trusion | Alter-ation |
|-----------|----------|-------------------|-----------------------------|---------------------|------------------------------------|-----------------|-----------|------------|-------------|
| 610       | 0.2006   | 0.73              | 0.0101                      | 0.264               | 0.246                              | 6.9             | M-c B     | X          | Chl-Ep      |
| 628       | 0.2002   | 0.81              | 0.0091                      | 0.233               | 0.205                              | 11.0            | M-c B     | X          | Chl-Ep      |
| 640       | 0.2006   | 0.35              | 0.0101                      | 0.264               | 0.261                              | 1.1             | M-c B     | X          | Chl-Ep      |
| 652       | 0.2016   | 0.54              | 0.0091                      | 0.233               | 0.211                              | 8.6             | M-c B     | X          | Chl-Ep      |
| 682       | 0.2000   | 0.31              | 0.0091                      | 0.233               | 0.222                              | 4.3             | M-c B     | X          | Chl-Ep      |
| 700       | 0.2003   | 0.13              | 0.0091                      | 0.233               | 0.226                              | 2.7             | M-c B     | X          | Chl-Ep      |
| 712       | 0.2005   | 0.32              | 0.0091                      | 0.233               | 0.223                              | 3.9             | F-m B     | X          | Chl-Ep      |
| 720       | 0.9994   | 0.41              | 0.0101                      | 0.264               | 0.238                              | 2.0             | BT        |            | Chl-Ep      |
| 742       | 0.2003   | 0.30              | 0.0091                      | 0.233               | 0.227                              | 2.3             | F-m B     | X          | Chl-Ep      |
| 780       | 0.2000   | 0.38              | 0.0091                      | 0.233               | 0.227                              | 2.4             | F-m B     | X          | Chl-Ep      |
| 800       | 0.2001   | 0.39              | 0.0091                      | 0.233               | 0.227                              | 2.4             | BT        |            | Ep-Amp      |
| 810       | 0.9999   | 0.20              | 0.0101                      | 0.262               | 0.211                              | 3.9             | BT        |            | Ep-Amp      |
| 830       | 0.2001   | 2.29              | 0.0091                      | 0.233               | 0.224                              | 3.6             | BT        |            | Ep-Amp      |
| 850       | 0.2001   | 0.42              | 0.0091                      | 0.234               | 0.222                              | 4.7             | BB        |            | Ep-Amp      |
| 862       | 0.2003   | 5.41              | 0.0091                      | 0.234               | 0.223                              | 4.5             | Ff        | X          | Ep-Amp      |
| 870       | 0.2012   | 0.21              | 0.0091                      | 0.234               | 0.225                              | 3.5             | BB        |            | Ep-Amp      |
| 880       | 0.2008   | 0.08              | 0.0091                      | 0.234               | 0.225                              | 3.5             | GB        |            | Ep-Amp      |
| 900       | 0.2000   | 0.14              | 0.0091                      | 0.234               | 0.228                              | 2.3             | Ff        | X          | Ep-Amp      |
| 930       | 0.2007   | 0.28              | 0.0091                      | 0.234               | 0.223                              | 4.3             | Ff        | X          | Ep-Amp      |
| 978       | 0.2014   | 0.35              | 0.0091                      | 0.234               | 0.228                              | 2.3             | BB        |            | Ep-Amp      |
| 992       | 0.2013   | 0.18              | 0.0091                      | 0.234               | 0.229                              | 1.9             | M-c B     | X          | Ep-Amp      |
| 1000      | 0.2003   | 0.28              | 0.0091                      | 0.234               | 0.226                              | 3.1             | BT        |            | Ep-Amp      |
| 1042      | 1.0005   | 0.09              | 0.0101                      | 0.262               | 0.252                              | 0.8             | GB        |            | Ep-Amp      |
| 1080      | 0.9999   | 0.19              | 0.0101                      | 0.263               | 0.250                              | 1.0             | F-m B     |            | Ep-Amp      |
| 1100      | 1.0001   | 0.16              | 0.0101                      | 0.263               | 0.238                              | 1.9             | Ff        | X          | Ep-Amp      |
| 1130      | 1.0009   | 0.40              | 0.0101                      | 0.263               | 0.216                              | 3.6             | GB        |            | Ep-Amp      |
| 1180      | 0.9997   | 0.17              | 0.0101                      | 0.263               | 0.244                              | 1.5             | M-c B     | X          | Ep-Amp      |
| 1202      | 0.2005   | 0.32              | 0.0091                      | 0.234               | 0.227                              | 2.7             | BB/M-c B  | X          | Ep-Amp      |
| 1210      | 0.2008   | 0.34              | 0.0091                      | 0.234               | 0.226                              | 3.1             | BB/M-c B  | X          | Ep-Amp      |
| 1220      | 0.2002   | 0.34              | 0.0091                      | 0.234               | 0.228                              | 2.3             | BB/M-c B  | X          | Ep-Amp      |
| 1232      | 0.2011   | 0.33              | 0.0101                      | 0.259               | 0.257                              | 0.8             | BGB/M-c B | X          | Ep-Amp      |
| 1240      | 0.2012   | 0.32              | 0.0101                      | 0.259               | 0.256                              | 1.2             | M-c B     | X          | Ep-Amp      |
| 1264      | 1.0010   | 0.21              | 0.0101                      | 0.263               | 0.231                              | 2.5             | M-c B     | X          | Ep-Amp      |
| 1266      | 1.0012   | 0.70              | 0.0101                      | 0.263               | 0.224                              | 3.0             | M-c B     | X          | Ep-Amp      |
| 1268      | 1.0000   | 0.43              | 0.0101                      | 0.263               | 0.230                              | 2.5             | M-c B     | X          | Ep-Amp      |
| 1310      | 0.2007   | 0.41              | 0.0101                      | 0.259               | 0.257                              | 0.8             | M-c B     | X          | Ep-Amp      |
| 1360      | 0.2011   | 0.27              | 0.0101                      | 0.259               | 0.255                              | 1.6             | M-c B     | X          | Ep-Amp      |
| 1370      | 0.2004   | 0.26              | 0.0101                      | 0.259               | 0.257                              | 0.8             | M-c B     | X          | Ep-Amp      |
| 1402      | 0.2003   | 0.32              | 0.0101                      | 0.259               | 0.256                              | 1.2             | M-c B     | X          | Ep-Amp      |

| Depth (m) | Mass (g) | Water content (%) | C <sub>Cu-trien</sub> (mol) | Ab-sorbance (blank) | Absorbance (super-natant solution) | CEC (meq/100 g) | Lithology | In-trusion | Alter-ation |
|-----------|----------|-------------------|-----------------------------|---------------------|------------------------------------|-----------------|-----------|------------|-------------|
| 1430      | 0.2006   | 0.35              | 0.0101                      | 0.264               | 0.256                              | 3.1             | M-c B     | X          | Ep-Amp      |
| 1450      | 0.2008   | 0.26              | 0.0101                      | 0.264               | 0.259                              | 1.9             | F-m B     |            | Ep-Amp      |
| 1516      | 1.0000   | 0.17              | 0.0101                      | 0.260               | 0.242                              | 1.4             | M-c B     | X          | Ep-Amp      |
| 1570      | 0.9998   | 0.08              | 0.0101                      | 0.260               | 0.248                              | 0.9             | M-c B     | X          | Ep-Amp      |
| 1602      | 1.0013   | 0.33              | 0.0101                      | 0.260               | 0.241                              | 1.5             | BT        |            | Ep-Amp      |
| 1630      | 1.0009   | 0.17              | 0.0101                      | 0.260               | 0.246                              | 1.1             | BT        |            | Ep-Amp      |
| 1680      | 0.2004   | 0.18              | 0.0101                      | 0.264               | 0.263                              | 0.4             | BT        |            | Ep-Amp      |
| 1690      | 0.2014   | 0.29              | 0.0101                      | 0.264               | 0.262                              | 0.8             | M-c B     | X          | Ep-Amp      |
| 1756      | 0.9997   | 0.30              | 0.0101                      | 0.260               | 0.226                              | 2.7             | M-c B     | X          | Ep-Amp      |
| 1906      | 0.9992   | 0.18              | 0.0101                      | 0.260               | 0.239                              | 1.6             | CB        | X          | Ep-Amp      |
| 2110      | 0.9992   | 0.29              | 0.0101                      | 0.264               | 0.236                              | 2.2             | CB        |            | Ep-Amp      |

Abbreviation lithologies. BB: basaltic breccia; F-m B: fine- to medium-grained basalt; BT: basaltic tuff; GB: glassy basalt; M-c B: medium-to coarse-grained basalt; CB: coarse-grained basalt; Ff: felsic fine-grained rock; X: intrusion, (x): possible intrusion. Alteration zones. Zeo-Sme: zeolite-smectite; MLC: mixed-layers clays; Chl-Ep: chlorite-epidote; Ep-Amp: epidote-amphibole.
